# Supplementary material for: Transcatheter Aortic Valve Replacement Prognostication with Augmented Mean Arterial Pressure
Source: MDPI journal article supplement (doi:10.3390/jcdd10050192), 2023-04-26
Supplement: s1 [file s1]

## Supplementary materials

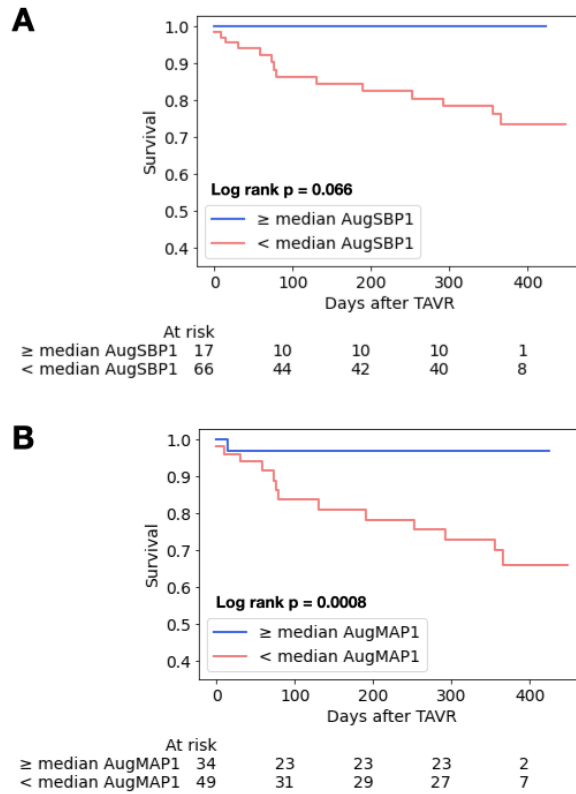

**Figure S1.** AugSBP1 and AugMAP1 in patients with low-flow, low-gradient severe aortic stenosis. Panel A. Patients with  $\geq$  median AugSBP1 had better survival compared to patients with  $<$  median AugSBP1; the median of AugSBP1 is 171 mmHg (log-rank  $p = 0.066$ ). Panel B. Patients with  $\geq$  median AugMAP1 had significantly better survival compared to patients with  $<$  median AugMAP1; the median of AugMAP1 is 102.5 mmHg (log-rank  $p = 0.0008$ ).

**Table S1.** Baseline Patient Characteristics (Grouped by high vs. low AugMAP1).

| Group                                    | Higher AugMAP1 | Lower AugMAP1  | Total          | P value |
|------------------------------------------|----------------|----------------|----------------|---------|
| Variables                                | N=510          | N=464          | N=974          |         |
| <b>Baseline Demographics</b>             |                |                |                |         |
| Age(yr)                                  | 81.4 $\pm$ 8.0 | 81.4 $\pm$ 8.6 | 81.4 $\pm$ 8.3 | 0.84    |
| Male sex (%)                             | 259 (50.8%)    | 292 (62.9%)    | 551 (56.6%)    | 0.001   |
| Caucasian race                           | 497 (97.5%)    | 450 (97.0%)    | 947 (97.6%)    | 0.79    |
| STS risk score                           | 7.7 $\pm$ 4.4  | 8.7 $\pm$ 5.9  | 8.2 $\pm$ 5.2  | 0.003   |
| Hypertension                             | 430 (84.3%)    | 391 (84.3%)    | 821 (84.3%)    | 1.00    |
| Diabetes mellitus                        | 172 (33.7%)    | 182 (39.2%)    | 354 (36.3%)    | 0.20    |
| PriorMI                                  | 101 (19.8%)    | 136 (29.3%)    | 237 (24.3%)    | 0.003   |
| Prior CABG                               | 112 (22.0%)    | 138 (29.7%)    | 250 (25.7%)    | 0.021   |
| Prior Stroke                             | 39 (7.6%)      | 56 (12.1%)     | 95 (9.8%)      | 0.067   |
| Prior PAD                                | 238 (46.7%)    | 258 (55.6%)    | 496 (50.9%)    | 0.021   |
| Current dialysis                         | 23 (4.5%)      | 16 (3.4%)      | 39 (4.0%)      | 0.70    |
| Atrial fib/flutter                       | 185 (36.3%)    | 221 (47.6%)    | 406 (41.7%)    | 0.002   |
| Permanent pacemaker                      | 69 (13.5%)     | 75 (16.2%)     | 144 (14.8%)    | 0.51    |
| Previous implantable cardioverter device | 20 (3.9%)      | 18 (3.9%)      | 38 (3.9%)      | 1.00    |
| NYHA class within 2 weeks                |                |                |                | 0.56    |

|                                                           |             |             |             |         |
|-----------------------------------------------------------|-------------|-------------|-------------|---------|
| I                                                         | 18 (3.5%)   | 12 (2.6%)   | 30 (3.1%)   |         |
| II                                                        | 115 (22.5%) | 96 (20.7%)  | 211 (21.7%) |         |
| III                                                       | 315 (61.8%) | 278 (59.9%) | 593 (60.9%) |         |
| IV                                                        | 62 (12.2%)  | 78 (16.8%)  | 140 (14.4%) |         |
| Device Type                                               |             |             |             | 0.67    |
| Balloon expandable vlave                                  | 415 (81.4%) | 367 (79.1%) | 782 (80.3%) |         |
| Self expanding valve                                      | 95 (18.6%)  | 97 (20.9%)  | 192 (19.7%) |         |
| AVDMorphology                                             |             |             |             |         |
| Tricuspid                                                 | 500 (98.0%) | 456 (98.3%) | 956 (98.2%) | 0.99    |
| Bicuspid                                                  | 4 (0.8%)    | 4 (0.9%)    | 8 (0.8%)    |         |
| Uncertain                                                 | 6 (1.2%)    | 4 (0.9%)    | 10 (1.0%)   |         |
| <b>Augmented blood pressure parameters</b>                |             |             |             |         |
| Heart Rate                                                | 70.8±12.9   | 69.5±13.2   | 70.2±13.0   | 0.11    |
| Systolic Blood Pressure                                   | 142.8±19.4  | 115.5±13.4  | 129.3±21.6  | <0.0001 |
| Diastolic Blood Pressure                                  | 76.9±11.0   | 58.9±8.2    | 68.0±13.2   | <0.0001 |
| Mean arterial blood pressure                              | 98.8±9.9    | 77.8±7.4    | 88.3±13.6   | <0.0001 |
| Aortic vlave systolic mean gradient (mm Hg)               | 47.2±13.4   | 40.5±11.7   | 44.0±13.1   | <0.0001 |
| Aortic valve systolic maximal instantaneous gradient      | 76.7±21.4   | 66.3±19.4   | 71.7±21.1   | <0.0001 |
| Aortic valve systolic peak velocity by CWD                | 4.4±0.6     | 4.1±0.6     | 4.2±0.6     | <0.0001 |
| Aortic Valve Systolic Area by Velocity                    | 0.8±0.2     | 0.9±0.3     | 0.9±0.3     | 0.0001  |
| AugSBP1                                                   | 189.9±22.2  | 156.0±16.2  | 173.0±25.8  | <0.0001 |
| AugSBP2                                                   | 219.7±26.6  | 182.0±22.0  | 200.7±30.8  | <0.0001 |
| AugMAP1                                                   | 114.5±9.8   | 91.3±7.6    | 102.9±14.6  | <0.0001 |
| AugMAP2                                                   | 124.2±10.6  | 99.9±8.9    | 111.9±15.6  | <0.0001 |
| AugMAP3                                                   | 146.0±14.8  | 118.3±12.5  | 132.1±19.5  | <0.0001 |
| Zva                                                       | 4.5±1.0     | 3.8±1.0     | 4.2±1.1     | <0.0001 |
| <b>Medications</b>                                        |             |             |             |         |
| Aspirin                                                   | 69 (13.5%)  | 74 (15.9%)  | 143 (14.7%) | 0.56    |
| Beta Blocker                                              | 351 (69.1%) | 314 (68.9%) | 665 (69.0%) | 1.00    |
| ACE Inhibitor                                             | 83 (16.3%)  | 88 (19.3%)  | 171 (17.8%) | 0.65    |
| ARB                                                       | 59 (11.6%)  | 28 (6.1%)   | 87 (9.0%)   | 0.009   |
| <b>Labs</b>                                               |             |             |             |         |
| Hemoglobin (g/dL)                                         | 12.3±1.8    | 11.8±1.8    | 12.1±1.8    | <0.0001 |
| Creatinine (mg/dL)                                        | 1.4±1.2     | 1.4±1.0     | 1.4±1.1     | 0.0004  |
| Total albumin (g/dL)                                      | 4.1±0.4     | 4.1±0.4     | 4.1±0.4     | 0.22    |
| <b>Echocardiography parameters</b>                        |             |             |             |         |
| Left ventricular mass index (g/m <sup>2</sup> )           | 227.8±65.8  | 226.6±65.4  | 227.2±65.6  | 0.90    |
| Left ventricular ejection fraction(%)                     | 59.1±12.1   | 55.8±13.9   | 57.5±13.1   | 0.0005  |
| Estimated right atrial pressure (mmHg)                    | 6.9±3.7     | 7.9±4.4     | 7.4±4.1     | 0.0005  |
| Right ventricular systolic pressure (mm Hg)               | 41.0±13.7   | 42.3±14.7   | 41.7±14.2   | 0.15    |
| Left ventricular internal systolic dimension              | 31.7±8.1    | 33.8±9.1    | 32.7±8.7    | <0.0001 |
| Left ventricular internal end diastolic dimension (mm)    | 48.0±6.9    | 49.8±7.6    | 48.9±7.3    | <0.0001 |
| Left ventricular stroke volume index (mL/m <sup>2</sup> ) | 43.9±9.3    | 43.2±10.3   | 43.6±9.8    | 0.22    |
| Transvalvular flow rate (Q, mL/s)                         | 249.1±54.5  | 271.1±87.9  | 259.8±73.4  | <0.0001 |
| Left ventricular cardiac output (L/min)                   | 5.7±1.3     | 5.5±1.3     | 5.6±1.3     | 0.03    |
| Left ventricular internal end diastolic dimension         | 31.7±8.1    | 33.8±9.1    | 32.7±8.7    | <0.0001 |
| Aortic valve systolic TVI (cm)                            | 106.7±19.7  | 97.7±19.4   | 102.3±20.0  | <0.0001 |
| ≥ moderate aortic regurgitation                           | 62 (13.0%)  | 65 (15.4%)  | 127 (14.3%) | 0.0002  |
| ≥ moderate mitral valve regurgitation                     | 107 (21.1%) | 134 (29.0%) | 241 (24.8%) | 0.21    |
| ≥ moderate tricuspid valve regurgitation                  | 116 (22.7%) | 127 (27.4%) | 243 (25.0%) | 0.39    |

STS: Society of Thoracic Surgeons, MI: myocardial infarction, CABG: coronary artery bypass graft, PAD: peripheral artery disease, NYHA: New York Heart Association, SBP: systolic blood pressure, MAP: mean arterial pressure, Zva: Valvulo-arterial impedance, ACE: angiotensin converting enzyme, ARB: angiotensin receptor blocker, LV: left ventricle.
